# Supplementary material for: Efficacy and safety of SARS-CoV-2 vaccination in patients with inflammatory bowel disease on immunosuppressive and biological therapy: Prospective observational study
Source: PLoS One. 2022 Sep 2;17(9):e0273612. doi: 10.1371/journal.pone.0273612 (PMC9439210; doi:10.1371/journal.pone.0273612)
Supplement: S1 File — (XLSX) [file pone.0273612.s002.xlsx]

## Sheet: Biological Therapy
UC/CD	SEX	AGE	BT	Intenzification	BEFORE 1.dose IgG	BEFORE 2.dose IgG	AFTER 2.dose IgG
CD	M	66	adalimumab		0.7	0.79	844.07
CD	F	66	infliximab		1.96	0.98	994.24
CD	M	65	infliximab		0.11	0.2	236.17
CD	F	70	infliximab	y	0.17	8.3	>1000
CD	F	74	infliximab		0.13	4.18	>1000
CD	F	74	adalimumab		0.21	0.21	30.8
CD	M	70	adalimumab	y	0.22	10.6	500.91
CD	F	64	adalimumab		0.19	5.91	193.25
UC	F	67	adalimumab		0.16	42.53	>1000
CD	M	67	adalimumab	y	0.15	328.93	>1000
CD	F	42	adalimumab		0.62	150.52	>1000
CD	M	54	infliximab		0.17	6.02	174.2
CD	M	52	infliximab		0.3	>1000	>1000
CD	M	59	infliximab	y	0.14	10.34	576.24
CD	F	59	adalimumab	y	0.3	>1000	802.62
CD	F	58	adalimumab		0.92	7.98	642.23
UC	M	55	adalimumab		3.24	>1000	978.9
CD	F	61	adalimumab		0.16	104.31	>1000
CD	M	55	adalimumab		0.19	18.01	>1000
CD	M	54	adalimumab		0.17	10.55	683.29
CD	M	37	adalimumab		0.54	>1000	>1000
UC	M	46	golimumab		0.25	947.33	>1000
CD	M	41	adalimumab	y	0.6	>1000	>1000
CD	M	47	adalimumab		0.23	19.36	501.94
CD	M	43	adalimumab		0.28	195.35	>1000
CD	F	46	adalimumab	y	0.6	6.39	14.96
UC	F	48	adalimumab		0.9	>1000	>1000
CD	M	41	adalimumab		0.6	13.12	955.89
UC	M	45	infliximab		0.18	21.95	>1000
CD	M	42	infliximab	y	0.41	>1000	>1000
CD	F	50	infliximab		0.51	9.67	224.6
CD	M	44	infliximab		0.34	>1000	>1000
CD	M	41	infliximab		0.16	8.3	>1000
UC	M	50	infliximab		0.14	811.01	>1000
CD	M	45	infliximab		2.74	>1000	>1000
UC	M	42	infliximab	y	0.47	25.66	>1000
UC	M	41	infliximab		0.28	11.23	>1000
UC	M	50	infliximab	y	0.15	19.51	618.48
CD	M	46	infliximab		0.14	9.29	991.62
UC	F	46	infliximab	y	1.6	54.57	901.36
CD	M	44	infliximab		0.6	23.9	934.3
CD	M	46	infliximab		0.99	16.76	>1000
CD	F	23	adalimumab		0.5	>1000	>1000
CD	F	34	infliximab	y	0.15	9.24	>1000
CD	M	30	infliximab		0.41	9.59	616.35
CD	F	24	infliximab		0.29	71.28	>1000
UC	F	34	infliximab		0.73	>1000	>1000

## Sheet: AZA
UC/CD	SEX	AGE	DOSE	WEIGHT	DOSE TO WEIGHT	BEFORE 1.dose IgG	BEFORE 2.dose IgG	AFTER 2.dose IgG
UC	M	73	75mg/den	68	1.1	0.6	5.77	138.51
UC	F	74	50mg/den	58	0.9	0.18	10.19	>1000
CD	F	71	50mg/den	51	1	0.52	21.6	937.64
CD	M	67	125mg/den	78	1.6	0.44	8.41	833.8
CD	F	65	150mg/den	68	2.2	0.55	9.03	888.4
CD	F	65	100mg/den	61	1.6	0.55	20.94	>1000
CD	M	63	200mg/den	72	2.8	0.18	17.25	>1000
UC	F	63	50mg/den	70	0.7	1.1	>1000	>1000
UC	M	56	150mg/den	106	1.4	0.14	24.32	>1000
CD	M	56	200mg/den	105	1.9	0.5	227.1	>1000
CD	M	55	150mg/den	75	2	0.57	30.97	>1000
CD	F	52	50mg/den	59	0.8	0.57	366.87	>1000
UC	M	52	100mg/den	78	1.3	0.26	10.33	970.28
UC	F	50	150mg/den	82	1.8	0.19	468.67	>1000
CD	F	50	150mg/den	74	2	0.2	7.25	18.47
CD	M	47	100mg/den	79	1.3	2.43	>1000	>1000
UC	M	46	100mg/den	140	0.7	4.55	30.37	>1000
CD	F	47	150mg/den	87	1.7	0.51	6.67	39.38
UC	M	46	150mg/den	88	1.7	0.47	19.34	>1000
UC	M	44	175mg/den	88	2	0.22	40.59	>1000
CD	M	43	250mg/den	127	2	0.18	20.03	>1000
CD	M	43	100mg/den	95	1	0.41	>1000	>1000
UC	M	42	100mg/den	71	1.4	0.17	31.53	>1000
CD	M	41	150mg/den	80	1.9	0.32	11.1	>1000
UC	M	41	50mg/den	81	0.6	0.31	112.33	>1000
CD	M	68	25mg/den	96	0.3	0.23	5.96	17.54
CD	F	53	50mg/den	96	0.5	0.24	13.71	>1000
CD	M	65	50mg/den	69	0.7	0.33	19.96	>1000

## Sheet: BT and AZA
SEX	UC/CD	Concomitant Imuran dose	IMURAN dose to weight	AGE	BL	BEFORE 1.dose IgG	BEFORE 2.dose IgG	AFTER 2.dose IgG
F	UC	100mg/den, 87kg	1.2	57	adalimumab	0.18	5.96	>1000
M	CD	150mg/den, 83kg	1.8	52	infliximab	0.15	19.58	>1000
F	CD	150mg/den, 64kg	2.3	51	adalimumab	0.14	10.61	24.36
M	UC	150mg/den, 65kg	2.3	44	adalimumab	0.22	6.28	33.82
F	UC	150mg/den, 106kg	1.4	44	adalimumab	1.04	>1000	>1000
F	CD	100mg/den, 69kg	1.4	50	infliximab	0.41	7.85	301.18
F	CD	150mg/den, 75kg	2	47	infliximab	0.58	32.51	>1000
F	CD	100mg/den, 52kg	1.9	44	infliximab	0.5	29.32	986.02
F	CD	50mg/den, 72kg	0.7	42	adalimumab	0.8	>1000	>1000
M	UC	100mg/den, 64kg	1.6	27	infliximab	1.92	10.18	>1000
M	CD	125mg/den, 87kg	1.4	35	infliximab	0.24	108.9	>1000
M	UC	50mg/den, 69kg	0.7	27	infliximab	2.47	>1000	>1000

## Sheet: SAFETY
	DAY 1/0										DAY 1/1										DAY 1/2										DAY 1/3										DAY 1/4
	LR - ERYTHEMA	LR - PAIN	CR - TT AFTER	CR - MYALGIA	CR - ARTRALGIA	CR - CEFALGIA	CR - ANAPHYLAXIS	CR - OTHER	emerg.FKT	TOTAL	LR - ERYTHEMA	LR - PAIN	CR - TT AFTER	CR - MYALGIA	CR - ARTRALGIA	CR - CEFALGIA	CR - ANAPHYLAXIS	CR - OTHER	emerg.FKT	TOTAL	LR - ERYTHEMA	LR - PAIN	CR - TT AFTER	CR - MYALGIA	CR - ARTRALGIA	CR - CEFALGIA	CR - ANAPHYLAXIS	CR - OTHER	emerg.FKT	TOTAL	LR - ERYTHEMA	LR - PAIN	CR - TT AFTER	CR - MYALGIA	CR - ARTRALGIA	CR - CEFALGIA	CR - ANAPHYLAXIS	CR - OTHER	emerg.FKT	TOTAL	LR - ERYTHEMA	LR - PAIN	CR - TT AFTER	CR - MYALGIA	CR - ARTRALGIA	CR - CEFALGIA	CR - ANAPHYLAXIS	CR - OTHER	emerg.FKT
CD	1	0	36.7	0	0	0	0	0	0	99	1	0	36.6	0	0	0	0	0	0	100	0	0	36.6	0	0	0	0	0	0	100	0	0	36.4	0	0	0	0	0	0	100	0	0	36.3	0	0	0	0	0	0
CD	3	0	36.2	0	0	0	0	0	0	95	2	0	36.7	0	0	2	0	fatigue	0	95	1	0	36.7	0	0	0	0	0	0	95	0	0	36.6	0	0	0	0	0	0	100	0	0	36.4	0	0	0	0	0	0
UC	0	0	35.9	0	0	0	0	0	0	100	0	0	35.9	0	0	0	0	flu-like	0	50	0	0	36.1	0	0	0	0	0	0	100	0	0	36.1	0	0	0	0	0	0	100	0	0	36.1	0	0	0	0	0	0
CD	2	1	36.6	0	0	0	0	0	0	96	3	1	36.6	0	0	1	0	0	0	93	1	0	36.6	0	0	0	0	0	0	97	0	1	36.5	0	0	0	0	fatigue	0	99	0	0	36.4	0	0	0	0	0	0
UC	5	0	37.5	0	0	5	0	fatigue	0	80	5	0	36.2	0	4	3	0	0	0	80	2	0	35.7	0	2	0	0	fatigue	0	90	2	0	36	0	0	3	0	nausea	0	70	0	0	35.9	0	4	3	0	nausea	0
UC	1	0	36.7	0	0	2	0	fatigue	Paralen	90	3	0	35.7	2	0	3	0	fatigue	Ibuprofen 400mg tbl, 8:30	90	0	0	35.5	0	0	2	0	fatigue	0	90	0	0	36.5	0	0	0	0	0	0	100	0	0	36.1	0	0	0	0	0	0
UC	0	0	36.5	0	0	0	0	0	0	100	0	0	36.5	0	0	0	0	0	0	100	0	0	36.5	0	0	0	0	0	0	100	0	0	36.6	0	0	0	0	0	0	100	0	0	36.5	0	0	0	0	0	0
CD	4	3		5	0	5	0	0	0	99	3	2		0	0	0	0	0	0	100	0	0	0	0	0	0	0	0	0	100	0	0	0	0	0	0	0	0	0	100	0	0		0	0	0	0	0	0
CD	0	0	36.3	0	0	0	0	vertigo	0	80	4	0	36.7	3	0	0	0	0	Meloxicam 15mg tbl, 12:00	80	0	0	36.4	0	0	0	0	0	0	90	0	0	36.9	0	0	0	0	0	0	100	0	0	36.4	0	0	0	0	0	0
UC	0	0	36.2	2	0	4	0	fatigue	0	80	3	0	36.8	0	0	3	0	0	0	85	3	0	36.2	0	0	2	0	0	0	85	1	0	36.2	0	0	2	0	0	0	90	0	0	36.2	0	0	0	0	0	0
CD	0	0	36.5	0	0	0	0	0	0	100	0	0	36.5	0	0	0	0	0	0	100	0	0	36.2	0	0	0	0	0	0	100	0	0	36.6	0	0	0	0	0	0	100	0	0	36.4	0	0	0	0	0	0
CD	5	0	35.7	0	0	0	0	0	0	90	3	0	35.5	0	0	7	0	0	Aulin 100mg tbl 21:00	50	0	0	35.7	0	0	3	0	0	Paralen 250mg tbl,11:45	80	0	0	35.7	0	0	0	0	0	0	95	0	0	36.1	0	0	0	0	0	0
CD	0	0	36.2	0	0	0	0	0	0	95	3	0	36.2	0	0	2	0	0	0	98	0	0	36.6	0	0	0	0	0	0	100	0	0	36.8	0	0	1	0	0	Paralen extra 2x500mg, 08:00,18:00	75	0	0	36.6	0	0	1	0	0	0
CD	0	0	36	0	0	0	0	0	0	100	1	0	35	0	0	0	0	0	0	99	0	0	35.4	0	0	0	0	0	0	100	0	0	35.7	0	0	0	0	0	0	100	0	0	34.9	0	0	0	0	0	0
CD	6	0	36.5	6	0	0	0	fatigue	0	50	5	0	36.5	0	0	0	0	0	0	50	0	0	36.3	0	0	3	0	0	0	50	0	0	36.7	0	2	0	0	0	0	50	0	0	36	0	0	0	0	0	0
CD	0	0	35	0	0	0	0	0	0	100	0	0		0	0	0	0	0	0	100	0	0	35	0	0	0	0	0	0	100	0	0	35	0	0	0	0	0	0	100	0	0	35	0	0	0	0	0	0
CD	4	0	36.7	0	0	0	0	fatigue	0	75	5	0	36.6	0	0	0	0	fatigue	0	80	2	0	36.6	0	0	3	0	fatigue	Paralen 500mg tbl, 15:30	75	2	0	36.6	0	0	0	0	fatigue	0	85	0	0	36.6	0	2	5	0	fatigue	Ibalgin 400mg tbl 17:30
CD	0	0	36.5	0	0	0	0	0	0	100	2	0	36.5	0	0	0	0	0	0	100	0	0	36.5	0	0	0	0	0	0	100	0	0	36.5	0	0	0	0	0	0	100	0	0	36.5	0	0	0	0	0	0
UC	3	0	37	0	0	0	0	fatigue	0	90	1	0	36.6	0	0	0	0	fatigue	0	95	0	0	36.6	0	0	0	0	0	0	99	0	0	36.5	0	0	0	0	0	0	100	0	0	36.7	0	0	0	0	0	0
UC	4	0	36.8	0	0	5	0	0	Novalgin	95	2	0	36.6	0	0	0	0	0	0	98	0	0	36.5	0	0	0	0	0	0	100	0	0	36.5	0	0	0	0	0	0	100	0	0	36.5	0	0	0	0	0	0
UC	2	0	36.6	0	0	0	0	0	0	95	2	0	36.8	0	0	0	0	0	0	96	0	0	36.8	0	0	0	0	0	0	97	0	0	36.8	0	0	0	0	0	0	98	0	0	36.8	0	0	0	0	0	0
CD	2	0	36.4	0	0	0	0	0	0	95	5	0	36.4	6	4	0	0	0	0	50	5	0	36.3	4	3	0	0	0	0	60	2	0	36.2	2	3	0	0	0	0	95	2	0	36.6	0	0	0	0	0	0
CD	0	0	36.5	0	0	0	0	0	0	100	1	0	37	0	0	0	0	0	0	99	0	0	36.4	0	0	0	0	0	0	100	0	0	36.5	0	0	0	0	0	0	100	0	0	36.3	0	0	0	0	0	0
UC	1	0	36.4	1	1	2	0	0	0	70	2	0	36.2	0	0	0	0	0	0	95	0	0	36.2	0	0	0	0	0	0	95	0	0	36.1	0	0	0	0	0	0	95	0	0	36.6	0	0	0	0	0	0
UC	0	0	36.7	0	0	0	0	0	0	100	0	0	36.7	0	0	0	0	0	0	100	0	0	36.6	0	0	0	0	0	0	100	0	0	36.7	0	0	0	0	0	0	100	0	0	36.6	0	0	0	0	0	0
UC	0	0	35.4	0	0	0	0	0	0	100	0	0	36	0	0	0	0	0	0	100	0	0	36	0	0	0	0	0	0	100	0	0	35.2	0	0	0	0	0	0	100	0	0	35.5	0	0	0	0	0	0
CD	4	0	36.5	4	0	0	0	0	0	95	3	0	36.3	0	0	0	0	0	0	100	2	0	36.1	0	0	0	0	0	0	98	0	0	36.6	0	0	0	0	0	0	100	0	0	36.3	0	0	0	0	0	0
CD	9	0	36.3	9	9	6	0	exanthem	0	20	2	0	36	0	0	0	0	0	0	70	0	0	36.5	0	0	0	0	0	0	100	0	0	36.5	0	0	0	0	0	0	100	0	0	36.5	0	0	0	0	0	0
UC	3	0	36	0	0	0	0	0	0	95	1	0	35.7	0	0	0	0	0	0	99	0	0	35.8	0	0	0	0	0	0	100	0	0	35.7	0	0	0	0	0	0	100	0	0	35.9	0	0	0	0	0	0
UC	0	0	36.6	0	0	0	0	0	0	100	0	0	36.6	0	0	0	0	0	0	100	0	0	36.6	0	0	0	0	0	0	100	0	0	36.6	0	0	0	0	0	0	100	0	0	36.6	0	0	0	0	0	0
UC	7	0	36.6	0	5	5	0	0	paralen	50	7	0	36.6	4	4	5	0	0	0	50	3	1	36.7	5	5	0	0	0	0	80	2	1	36.7	3	3	2	0	0	0	80	2	0	36.7	2	2	2	0	0	0
CD	0	0	35.9	0	0	0	0	0	0	99	0	0	36	0	0	0	0	0	0	99	0	0	35.7	0	0	0	0	0	0	99	0	0	35.9	0	0	0	0	0	0	99	0	0	36	0	0	0	0	0	0
CD	3	0	37.8	5	5	0	0	fatigue	0	50	0	0	36.6	0	0	0	0	0	0	80	0	0	36.4	0	0	0	0	0	0	80	0	0	36.6	0	0	0	0	0	0	100	0	0	36.6	0	0	0	0	0	0
CD	1	0	36.6	0	0	0	0	0	0	100	3	0	36.4	0	0	0	0	0	0	95	1	0	36.6	0	0	0	0	0	0	100	0	0	36.3	0	0	0	0	0	0	100	0	0	36.5	0	0	0	0	0	0
CD	0	0	37	0	9	9	0	0	0	95	0	0	37	8	9	0	0	0	0	0	0	0	36	0	0	0	0	0	0	100	0	0	37	0	0	0	0	0	0	100	0	0	37	0	0	0	0	0	0
UC	1	0	36.6	0	1	0	0	0	0	90	2	0	36.6	0	1	0	0	0	0	95	1	0	36.8	0	0	0	0	0	0	100	0	0	36.7	0	0	0	0	0	0	100	0	0	36.8	0	0	0	0	0	0
UC	0	0	37.3	0	0	0	0	0	0	95	3	0	36.7	0	0	3	0	0	ibalgin rapid 21:00	90	0	0	36.4	0	0	0	0	0	0	100	0	0	36.4	0	0	0	0	0	0	100	0	0	37.6	0	0	0	0	0	ibalgin rapid, 400mg, 0:15
CD	1	0	36.7	0	0	0	0	nausea	0	85	1	0	36.6	0	0	0	0	0	0	95	1	0	36.7	0	0	0	0	0	0	95	1	0	36.4	0	0	0	0	0	0	95	0	0	36.6	0	0	0	0	0	0
CD	2	0	36	0	0	3	0	0	0	90	6	0	36.3	0	0	0	0	0	0	90	1	0	36.4	0	0	0	0	0	0	95	0	0	35.7	0	0	0	0	0	0	100	0	0	36.2	0	0	0	0	0	0
CD	2	0	36.5	0	0	0	0	0	0	90	2	0	36.8	0	0	4	0	fatigue	0	80	1	0	36.5	0	0	0	0	0	0	90	0	0	36.6	0	0	0	0	0	0	100	0	0	36.5	0	0	0	0	0	0
CD	0	0	36.8	0	0	0	0	0	0	100	2	0	36.6	0	0	0	0	0	0	100	0	0	36.5	0	0	0	0	0	0	100	0	0	36.6	0	0	0	0	0	0	100	0	0	36.5	0	0	0	0	0	0
CD	1	0	36.7	0	0	0	0	0	0	95	2	0	36.2	0	0	0	0	lymfadenopathy	0	70	3	0	36.8	0	0	0	0	lymfadenopathy	0	80	3	0	36.7	0	0	0	0	lymfadenopathy	0	85	3	0	36.5	0	0	0	0	lymfadenopathy	0
CD	0	0	36	0	0	0	0	fatigue	0	50	5	0	36	5	0	5	0	0	0	50	5	0	36.4	0	0	0	0	0	0	100	0	0	36.4	0	0	0	0	0	0	100	0	0	36.6	0	0	0	0	0	0
UC	0	0	36.8	0	0	0	0	0	0	100	0	0	36.9	0	0	0	0	0	0	100	0	0	36.4	0	0	0	0	0	0	100	0	0	36.7	0	0	0	0	0	0	100	0	0	36.4	0	0	0	0	0	0
CD	0	0	35.9	0	0	0	0	0	0	100	0	0	35.2	0	0	0	0	0	0	100	0	0	35.7	0	0	0	0	0	0	100	0	0	35.5	0	0	0	0	0	0	100	0	0	35.4	0	0	0	0	0	0
CD	6	0	36.8	0	0	0	0	fatigue	0	70	5	0	36.5	0	0	0	0	0	0	85	4	0	36.5	0	0	0	0	fatigue	0	85	0	0	36.6	0	0	0	0	0	0	90	0	0	36.3	0	0	0	0	0	0
CD	0	0	36.7	0	0	0	0	0	0	100	1	0	36.7	0	0	3	0	0	algifen neo. 40kapek, 16:30	95	0	0	36.9	0	0	0	0	0	0	100	0	0	36.8	0	0	0	0	0	0	100	0	0	36.5	0	0	0	0	0	0
CD	3	0	36.2	0	0	0	0	fatigue	0	95	2	0	36.4	0	0	2	0	fatigue	0	95	1	0	36.7	0	0	0	0	0	0	98	0	0	36.6	0	0	0	0	0	0	100	0	0	36.4	0	0	0	0	0	0
CD	1	0	36.5	0	0	0	0	0	0	99	1	0	36.6	0	0	0	0	0	0	99	0	0	36.6	0	0	0	0	0	0	100	0	0	36.6	0	0	0	0	0	0	100	0	0	36.6	0	0	0	0	0	0
[truncated: 111 more columns]
